# Supplementary material for: Physiological epicotyl dormancy and its alleviation in seeds of Yunnanopilia longistaminea: the first report of physiological epicotyl dormancy in China
Source: PeerJ. 2017 Jul 19;5:e3435. doi: 10.7717/peerj.3435 (PMC5520962; doi:10.7717/peerj.3435)
Supplement: Data S1 [file peerj-05-3435-s001.xlsx]

## Sheet: Sheet1
Effects of stratification and desiccation on radicle growth
Stratification
	test 1	test 2	test 3	test 4	average	SE
5℃	0	0	0	0	0	0
15℃	1	1	2	0	10	4.08248
20℃	2	3	3	4	30	4.08248
25℃	3	4	1	3	27.5	6.29153
28℃	5	5	6	4	50	4.08248
30℃	2	2	2	2	20	0
28/20℃	7	7	6	7	67.5	2.5
28/15℃	7	0	3	4	35	14.4338
Desiccation treatments
Radicle emergence percentage	0h	6h	9h	12h	24h
test 1	3	1	1	0	0
test 2	2	1	1	1	0
test 3	2	2	1	0	0
average	38.8889	22.2222	16.6667	5.55556	0
SE	4.81125	4.81125	0	4.81125	0
Moisture content percentage
average	25.6	24.4	23.5333	19.6	0
SE	1.55242	0.35	0.929157	0.953939	0
GA3
GA3Solution	test 1	test 2	test 3	average	SE
0	3	4	5	40	5
50	6	4	7	56.6667	7.63763
100	8	9	10	90	5
200	5	4	8	56.6667	10.4083
Cold stratification
days	test 1	test 2	test 3	average	SE
0	3	4	5	40	10
7	9	9	8	86.6667	5.7735
14	9	8	7	80	10
21	7	7	6	66.6667	5.7735
28	6	4	4	46.6667	11.547
35	3	3	2	26.6667	5.7735
